# Supplementary material
Source: PubMed Central journal article supplement (PMC8765823)
Supplement: 15006_2021_541_MOESM1_ESM.pdf [file 15006_2021_541_MOESM1_ESM.pdf]

## Literatur

1. Carfi A, Bernabei R, Landi F; Gemelli Against COVID-19 Post-Acute Care Study Group. Persistent Symptoms in Patients After Acute COVID-19. *JAMA*. 2020 Aug 11; 324(6):603-605.
2. Dennis A, Wamil M, Alberts J et al. COVERSCAN study investigators. Multiorgan impairment in low-risk individuals with post-COVID-19 syndrome: a prospective, community-based study. *BMJ Open*. 2021 Mar 30;11(3):e048391.
3. Huang C, Huang L, Wang Y et al. 6-month consequences of COVID-19 in patients discharged from hospital: a cohort study. *Lancet*. 2021 Jan 16;397(10270):220-232.
4. El Sayed S, Shokry D, Gomaa SM. Post-COVID-19 fatigue and anhedonia: A cross-sectional study and their correlation to post-recovery period. *Neuropsychopharmacol Rep*. 2021 Mar;41(1):50-55.
5. Taquet M, Geddes JR, Husain M et al. 6-month neurological and psychiatric outcomes in 236 379 survivors of COVID-19: a retrospective cohort study using electronic health records. *Lancet Psychiatry*. 2021 May;8(5):416-427.
6. Halpin SJ, McIvor C, Whyatt G et al. Postdischarge symptoms and rehabilitation needs in survivors of COVID-19 infection: A cross-sectional evaluation. *J Med Virol*. 2021 Feb;93(2):1013-1022.
7. Venkatesan P. NICE guideline on long COVID. *Lancet Respir Med*. 2021 Feb;9(2):129.
8. Sudre CH, Murray B, Varsavsky T et al. Attributes and predictors of long COVID. *Nature Medicine* 2021; 27: 626-631.
9. Lund LC, Hallas J, Nielsen H et al. Post-acute effects of SARS-CoV-2 infection in individuals not requiring hospital admission: a Danish population-based cohort study. *Lancet Infect Dis*. 2021 Oct; 21(10):1373-1382.
10. Marx V. Scientists set out to connect the dots on long COVID. *Nat Methods*. 2021 May;18(5):449-453.
11. Gupta A, Madhavan MV, Sehgal K et al. Extrapulmonary manifestations of COVID-19. *Nature Medicine* 2020; 26 (7): 1017-32
12. Gaebler C, Wang Z, Lorenzi JCC et al. Evolution of Antibody Immunity to SARS-CoV-2. *Nature* 2021; 591: 639-44
13. Hopkinson NS, Jenkins G, Hart N. COVID-19 and what comes after? *Thorax*. 2021 Apr; 76(4):324-325.
14. Scherbakov N, Szklarski M, Scheibenbogen C et al. Peripheral endothelial dysfunction in myalgic encephalomyelitis/chronic fatigue syndrome. *ESC Heart Fail*. 2020 Jun;7(3):1064-1071.
15. Klok FA, Boon GJAM, Barco S et al. The Post-COVID-19 Functional Status scale: a tool to measure functional status over time after COVID-19. *Eur Respir J*. 2020 Jul 2;56(1):2001494
16. Long B, Brady WJ, Koyfman A, Gottlieb M. Cardiovascular complications in COVID-19. *Am J Emerg Med*. 2020 Jul;38(7):1504-1507.
17. Kochi AN, Tagliari AP, Forleo GB et al. Cardiac and arrhythmic complications in patients with COVID-19. *J Cardiovasc Electrophysiol*. 2020 May;31(5):1003-1008.
18. Knuuti J, Wijns W, Saraste A et al. ESC Scientific Document Group. 2019 ESC Guidelines for the diagnosis and management of chronic coronary syndromes. *Eur Heart J*. 2020 Jan 14;41(3):407-477.
19. Puntmann VO, Carerj ML, Wieters I et al. Outcomes of Cardiovascular Magnetic Resonance Imaging in Patients Recently Recovered From Coronavirus Disease 2019 (COVID-19). *JAMA Cardiol*. 2020 Nov 1;5(11):1265-1273.
20. Kotecha T, Knight DS, Razvi Y et al. Patterns of myocardial injury in recovered troponin-positive COVID-19 patients assessed by cardiovascular magnetic resonance. *Eur Heart J*. 2021 May 14;42(19):1866-1878.
21. Joy G, Artico J, Kurdi H et al. COVIDsortium Investigators. Prospective Case-Control Study of Cardiovascular Abnormalities 6 Months Following Mild COVID-19 in Healthcare Workers. *JACC Cardiovasc Imaging*. 2021 Nov;14(11):2155-2166.
22. Kocuzilla AR, Ankermann T, Behrends U et al. S1-Leitlinie Post-COVID/Long-COVID, AWMF-Register Nr. 020/027
23. Sonnweber T, Sahanic S, Pizzini A et al. Cardiopulmonary recovery after COVID-19: an observational prospective multicentre trial. *Eur Respir J*. 2021 Apr 29;57(4):2003481.
24. Manolis AS, Manolis TA, Manolis AA et al. COVID-19 infection: viral macro- and micro-vascular coagulopathy and thromboembolism/prophylactic and therapeutic management. *J Cardiovasc Pharmacol Ther* 2021; 26(1): 12-24.
25. Konstantinides SV, Meyer G, Becattini C et al. 2019 ESC Guidelines for the diagnosis and management of acute pulmonary embolism developed in collaboration with the European Respiratory Society (ERS): The Task Force for the diagnosis and management of acute pulmonary embolism of the European Society of Cardiology (ESC). *Eur Respir J*. 2019 Oct 9; 54(3):1901647.
26. Kroenke K, Spitzer RL, Williams JB. The PHQ-9: validity of a brief depression severity measure. *J Gen Intern Med*. 2001 Sep;16(9):606-13.
27. Löwe B, Decker O, Müller S et al. Validation and standardization of the Generalized Anxiety Disorder Screener (GAD-7) in the general population. *Med Care*. 2008 Mar;46(3):266-74.
28. Kroenke K, Spitzer RL, Williams JB. The PHQ-15: Validity of a New Measure for Evaluating the Severity of Somatic Symptoms. *Psychosom Med* 2002;64:258-66
29. De Vries J, Michielsen H, Van Heck GL, Drent M. Measuring fatigue in sarcoidosis: the Fatigue Assessment Scale (FAS). *Br J Health Psychol*. 2004 Sep;9(Pt 3):279-91.
30. Smets EM, Garssen B, Bonke B, De Haes JC. The Multi-dimensional Fatigue Inventory (MFI) psychometric qualities of an instrument to assess fatigue. *J Psychosom Res*. 1995 Apr;39(3):315-25.
31. Lim EJ, Son CG. Review of case definitions for myalgic encephalomyelitis/chronic fatigue syndrome (ME/CFES). *J Transl Med*. 2020 Jul 29; 18(1):289.
32. Carruthers BM, van de Sande MI, De Meirleir KL et al. Myalgic encephalomyelitis: International Consensus Criteria. *J Intern Med*. 2011 Oct;270(4):327-38.
33. Garner R, Baraniuk JN. Orthostatic intolerance in chronic fatigue syndrome. *J Transl Med*. 2019 Jun 3;17(1):185.
34. Helms J, Kremer S, Merdji H et al. Neurologic Features in Severe SARS-CoV-2 Infection. *N Engl J Med*. 2020 Jun 4;382(23):2268-2270.
35. Caforio AL, Pankuweit S, Arbustini E et al.; European Society of Cardiology Working Group on Myocardial and Pericardial Diseases. Current state of knowledge on aetiology, diagnosis, management, and therapy of myocarditis: a position statement of the European Society of Cardiology Working Group on Myocardial and Pericardial Diseases. *Eur Heart J*. 2013 Sep;34(33):2636-48, 2648a-2648d.
36. Behr J, Günther A, Bonella F et al. S2K-Leitlinie zur Diagnostik der idiopathischen Lungenfibrose [German Guideline for Idiopathic Pulmonary Fibrosis]. *Pneumologie*. 2020 May; 74(5):263-293.
37. Spielmanns M, Pekacka-Egli AM, Schoendorf S et al. Effects of a Comprehensive Pulmonary Rehabilitation in Severe Post-COVID-19 Patients. *Int J Environ Res Public Health* 2021; 18.
38. Gloeckl R, Leil D, Jarosch I et al. Benefits of pulmonary rehabilitation in COVID-19: a prospective observational cohort study. *ERJ Open Res* 2021; 7.
